# Supplementary material for: Climate-driven biogenic emissions alleviate the impact of man-made emission reduction on O 3 control in Pearl River Delta region, southern China
Source: Copernicus journal article supplement (doi:10.5194/egusphere-2024-3771), 2025-01-20
Supplement: Supplementary file 1 [file egusphere-2024-3771-supplement.pdf]

**Supplementary file for “Climate-driven Biogenic Emissions alleviate the impact of man-made emission reduction on O<sub>3</sub> control in Pearl River Delta region, southern China”**

Nan WANG<sup>1,2\*</sup>, Song LIU<sup>1</sup>, Jiawei XU<sup>3</sup>, Yanyu WANG<sup>2</sup>, Chun LI<sup>1</sup>, Hua LU<sup>4\*</sup>, Fumo YANG<sup>1</sup>

<sup>1</sup>College of carbon Neutrality Future Technology, Sichuan University, Chengdu 610065, P. R. China

<sup>2</sup>State Environmental Protection Key Laboratory of Formation and Prevention of Urban Air Pollution Complex, Shanghai Academy of Environment Sciences, Shanghai 200233, P. R. China

<sup>3</sup>Centre for Geography and Environmental Science, University of Exeter, Penryn, United Kingdom

<sup>4</sup>Chongqing Institute of Meteorological Sciences, Chongqing 401147, P. R. China

**\*Correspondence:** WANG Nan ([nan.wang@scu.edu.cn](mailto:nan.wang@scu.edu.cn)) and LU Hua ([vibgyor0113@163.com](mailto:vibgyor0113@163.com))

## **Supporting Information**

Supporting Information includes 5 pages, 1 figures and 3 tables

SI Figures S1-S2, p3

SI Tables S1-S3, p4-p5

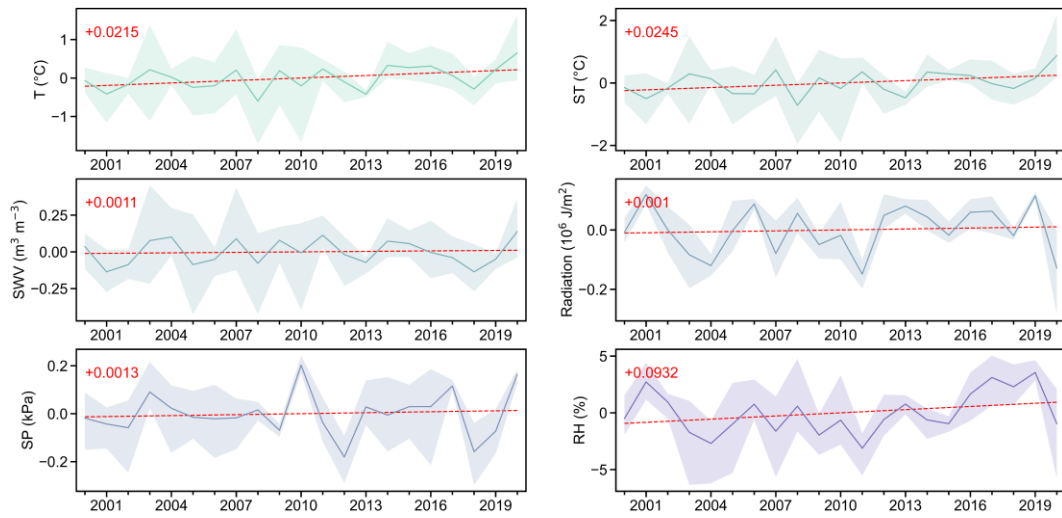

Fig S1 Annual variations of meteorological parameters in the PRD region from 2000-2020

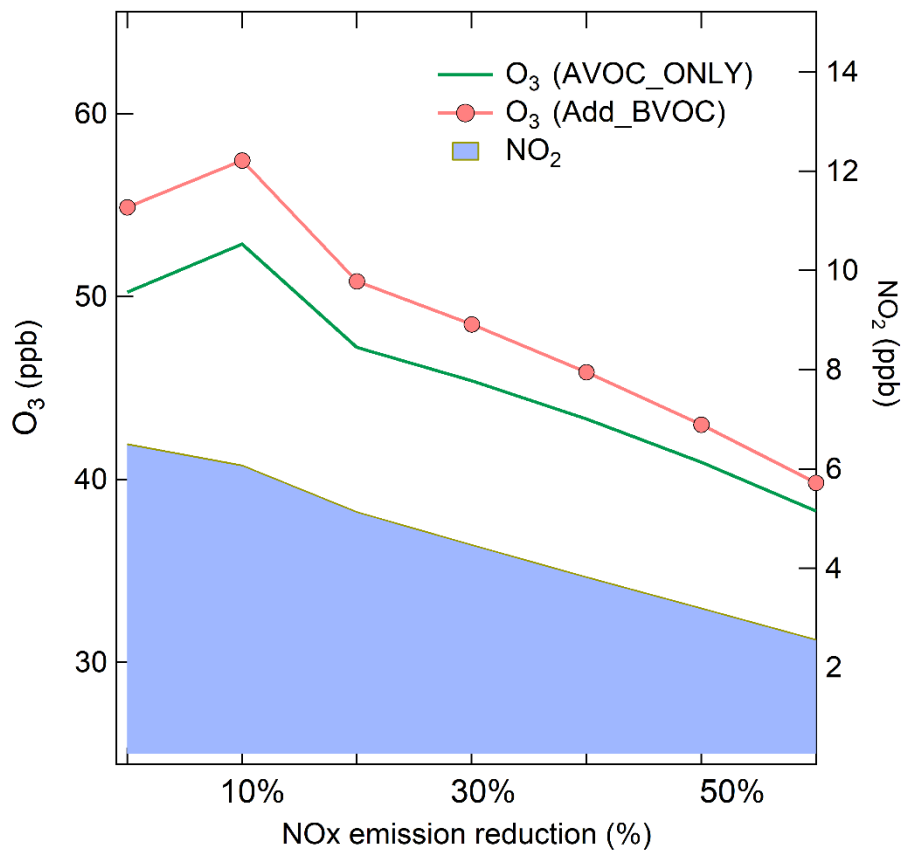

Fig S2 Responses of O<sub>3</sub> concentration to NO<sub>x</sub> emission reduction under different scenarios.

Table S1: Mapping of MODIS vegetation types to MEGAN-PFT based on climatic standards and climate data

| Original vegetation type         | Mapped vegetation type              | Climate standard                                                                                                                                                                                          |
|----------------------------------|-------------------------------------|-----------------------------------------------------------------------------------------------------------------------------------------------------------------------------------------------------------|
| Evergreen<br>Needle leaf Forests | Needleleaf evergreen temperate tree | $T_c > -19^\circ\text{C}$ and $\text{GDD} > 1200$                                                                                                                                                         |
| Deciduous<br>Needle leaf Forests | Needleleaf deciduous boreal tree    | -                                                                                                                                                                                                         |
| Evergreen<br>Needle leaf Forests | Needleleaf evergreen boreal tree    | $T_c \leq -19^\circ\text{C}$ or $\text{GDD} \leq 1200$                                                                                                                                                    |
| Evergreen<br>Broadleaf Forests   | Broadleaf evergreen tropical tree   | $T_c > 15.5^\circ\text{C}$                                                                                                                                                                                |
| Evergreen<br>Broadleaf Forests   | Broadleaf evergreen temperate tree  | $T_c \leq 15.5^\circ\text{C}$                                                                                                                                                                             |
| Deciduous<br>Broadleaf Forests   | Broadleaf deciduous tropical tree   | $T_c > 15.5^\circ\text{C}$                                                                                                                                                                                |
| Deciduous<br>Broadleaf Forests   | Broadleaf deciduous temperate tree  | $-15^\circ\text{C} < T_c \leq 15.5^\circ\text{C}$ , and $\text{GDD} > 1200$                                                                                                                               |
| Deciduous<br>Broadleaf Forests   | Broadleaf deciduous boreal tree     | $T_c \leq -15^\circ\text{C}$ or $\text{GDD} \leq 1200$                                                                                                                                                    |
| Shrublands                       | Broadleaf evergreen temperate shrub | $T_c > -19^\circ\text{C}$ , $\text{GDD} > 1200$ ,<br>$P_{\text{ann}} > 520$ mm and $P_{\text{win}} > 2/3 P_{\text{ann}}$                                                                                  |
| Shrublands                       | Broadleaf deciduous temperate shrub | $T_c > -19^\circ\text{C}$ , $\text{GDD} > 1200$ ,<br>and meeting either one of the following standard<br>(1) $P_{\text{ann}} \leq 520$ mm<br>(2) $P_{\text{win}} \leq 2/3 P_{\text{ann}}$                 |
| Shrublands                       | Broadleaf deciduous boreal shrub    | $T_c \leq -19^\circ\text{C}$ or $\text{GDD} \leq 1200$                                                                                                                                                    |
| Grasslands                       | Cold C3 grass                       | $\text{GDD} < 1000$                                                                                                                                                                                       |
| Grasslands                       | Cool C3 grass                       | $\text{GDD} > 1000$ , and meeting either one of the following standard<br>(1) $T_w \leq 22^\circ\text{C}$<br>(2) For months with temperatures exceeding $22^\circ\text{C}$ , $P_{\text{mon}} \leq 25$ mm. |
| Grasslands                       | Warm C3 grass                       | $\text{GDD} > 1000$ , $T_c > 22^\circ\text{C}$ and $P_{\text{mon}} > 25$ mm in the driest month                                                                                                           |
| Croplands                        | Other crops                         | -                                                                                                                                                                                                         |

Noting:  $T_c$  is the average temperature of the coldest month of the year,  $T_w$  is the average temperature of the warmest month, GDD represents the growing degree days (temperature above  $5^\circ\text{C}$ ),  $P_{\text{ann}}$  refers to annual precipitation,  $P_{\text{win}}$  is winter precipitation, and  $P_{\text{mon}}$  denotes monthly precipitation.

Table S2 Statistical validation of WRF-CMAQ performance in PRD region

|                      | MB    | RMSE  | IOA  |
|----------------------|-------|-------|------|
| T2 (°C)              | -0.6  | 2.1   | 0.91 |
| RH(%)                | -4.5  | 8.6   | 0.99 |
| Pressure (hPa)       | -15.1 | 28.5  | 0.89 |
| WS10 (m/s)           | 1.6   | 1.8   | 0.97 |
| O <sub>3</sub> (ppb) | 3.5   | 27.05 | 0.78 |

Noting: T2 indicates 2-meter temperature, WS10 indicates 10m wind speed. MB is mean bias, RMSE is root mean square and IOA is index of agreement.

Table S3 Parallel numerical simulation experiments

| Impact of each process     | Parallel numerical experiment | Land cover and LAI | Meteorology for BVOC emission | Meteorology for Chemistry | Anthropogenic emission |
|----------------------------|-------------------------------|--------------------|-------------------------------|---------------------------|------------------------|
| Man-made emission control  | EXP1                          | 2020               | 2020                          | 2020                      | 2012                   |
|                            | EXP2                          | 2020               | 2020                          | 2020                      | 2020                   |
| Vegetation-Change BVOC     | EXP1                          | 2001               | 2020                          | 2020                      | 2020                   |
|                            | EXP2                          | 2020               | 2020                          | 2020                      | 2020                   |
| Climate-driven BVOC        | EXP1                          | 2020               | 2001                          | 2020                      | 2020                   |
|                            | EXP2                          | 2020               | 2020                          | 2020                      | 2020                   |
| Climate-driven meteorology | EXP1                          | 2020               | 2020                          | 2001                      | 2020                   |
|                            | EXP2                          | 2020               | 2020                          | 2020                      | 2020                   |
